# Supplementary material
Source: PubMed Central journal article supplement (PMC5653553)
Supplement: 11606_2017_4126_MOESM1_ESM.pdf [file 11606_2017_4126_MOESM1_ESM.pdf]

# 2014 SGIM Membership Survey

## 1. Demographics

Thank you for taking the time to complete this 15-20 minute survey. This survey is confidential. You have been provided a unique survey link to better help us manage survey reminders. No identifying information will be used in the survey's analysis.

These questions have been reviewed and selected by the SGIM Membership Committee as they are considered relevant and essential to SGIM and its members. This survey is intended to inform policy and provide information for strategic planning within the organization.

### \*1. What is your gender?

- Female
- Male
- Prefer Not To Answer

### \*2. How old are you?

- <25
- 25-34
- 35-44
- 45-54
- 55-64
- >65
- Prefer Not To Answer

### \*3. With which racial or ethnic designation(s) do you identify? (Select all that apply.)

- African American/Black
- Asian
- Caucasian/White
- Latino/Hispanic
- Native American/Alaska Native
- Other
- Prefer Not To Answer

### \*4. Indicate degree(s) held. (Select all that apply.)

- BA/BS
- MD
- DO
- MA
- MBA
- JD
- PhD
- MPH, MHS, or MSPH
- MS or MSc
- Prefer Not to Answer
- Other (please specify)

# 2014 SGIM Membership Survey

## \*5. How long have you been a member of SGIM?

- 5 years or less
- 6-10 years
- 11-15 years
- Over 15 years

## \*6. In which SGIM region does your institution reside?

- |                                                                                    |                                                                                     |
|------------------------------------------------------------------------------------|-------------------------------------------------------------------------------------|
| <input type="radio"/> California/Hawaii (CA/ HI)                                   | <input type="radio"/> New England (CT, ME, MA, NH, RI, VT)                          |
| <input type="radio"/> Mid Atlantic (DE, DC, MA, NJ, NY, PA, PR)                    | <input type="radio"/> Northwest (AK, ID, MT, OR, WA)                                |
| <input type="radio"/> Midwest (IL, IN, IA, KS, MI, MN, MO, NE, ND, OH, OK, SD, WI) | <input type="radio"/> Southern (AL, AR, FL, GA, KY, LA, MS, NC, SC, TN, TX, VA, WV) |
| <input type="radio"/> Mountain (AZ, CO, NV, NM, UT, WY)                            | <input type="radio"/> None - International Member                                   |

## 2. Employment Background

Please complete the following questions on your current employment. This information will improve SGIM's ability to develop programming and understand our membership.

### 7. What is your current employment status?

- |                                                 |                                          |
|-------------------------------------------------|------------------------------------------|
| <input type="radio"/> I am currently unemployed | <input type="radio"/> Part Time (21-40%) |
| <input type="radio"/> Part Time (81-100%)       | <input type="radio"/> Part Time (1-20%)  |
| <input type="radio"/> Part Time (61-80%)        | <input type="radio"/> Full Time          |
| <input type="radio"/> Part Time (41-60%)        |                                          |

### 8. What is your current academic rank?

- In Training
- Instructor
- Clinical or Adjunct Faculty
- Assistant Professor
- Associate Professor
- Full Professor
- Not Applicable
- Other (please specify)

# 2014 SGIM Membership Survey

## 3. Employment Background continued

### 9. Which description best characterizes your current PRIMARY professional affiliation?

- Community Hospital or Practice
- Community Teaching Hospital or Practice
- Academic Medical Center
- Local, State or Federal Clinical Position - Non-VA / Non-Military
- VA / Military Hospital
- Other (please specify)
- VA Faculty at Academic Medical Center
- Global Health Organization
- Non-Profit Organization (not already listed)
- No Current Professional Affiliation

### 10. Overall, what proportion of your time is spent in the following activities?

|                | Not Applicable        | 1-24%                 | 25-49%                | 50-99%                | 100%                  |
|----------------|-----------------------|-----------------------|-----------------------|-----------------------|-----------------------|
| Administrative | <input type="radio"/> |
| Clinical       | <input type="radio"/> |
| Research       | <input type="radio"/> |
| Teaching       | <input type="radio"/> |

### 11. In your ideal job description, what proportion of your time would you spend in the following activities?

|                | Not Applicable        | 1-24%                 | 25-49%                | 50-99%                | 100%                  |
|----------------|-----------------------|-----------------------|-----------------------|-----------------------|-----------------------|
| Administrative | <input type="radio"/> |
| Clinical       | <input type="radio"/> |
| Research       | <input type="radio"/> |
| Teaching       | <input type="radio"/> |

### 12. In your CLINICAL EFFORTS ALONE, what percentage of time do you spend with learners?

- Not Applicable
- 1-24%
- 25-49%
- 50-99%
- 100%

# 2014 SGIM Membership Survey

## 13. Please check your areas of principle administrative responsibilities (Select all that apply; N/A if not applicable):

- |                                                                                                                              |                                                               |
|------------------------------------------------------------------------------------------------------------------------------|---------------------------------------------------------------|
| <input type="checkbox"/> N/A                                                                                                 | <input type="checkbox"/> Associate Residency Program Director |
| <input type="checkbox"/> Dean or Associate Dean                                                                              | <input type="checkbox"/> Medical Director                     |
| <input type="checkbox"/> Fellowship Director                                                                                 | <input type="checkbox"/> Research Center Director             |
| <input type="checkbox"/> Clerkship Director                                                                                  | <input type="checkbox"/> Course Director                      |
| <input type="checkbox"/> Division/Section Chief (such as GIM, hospital medicine, palliative care, geriatrics, etc)           | <input type="checkbox"/> Chair                                |
| <input type="checkbox"/> Associate Division/Section Chief (such as GIM, hospital medicine, palliative care, geriatrics, etc) | <input type="checkbox"/> Clinic Director                      |
| <input type="checkbox"/> Residency Program Director                                                                          | <input type="checkbox"/> Hospital Administration              |
| <input type="checkbox"/> Other (please specify)                                                                              |                                                               |

## 14. How important are the following skills or attributes to your current job?

|                                        | Not Applicable        | Not important         | Important             | Very Important        | Essential             |
|----------------------------------------|-----------------------|-----------------------|-----------------------|-----------------------|-----------------------|
| Clinical Skills                        | <input type="radio"/> |
| Financial Productivity in Practice     | <input type="radio"/> |
| Administrative Skills                  | <input type="radio"/> |
| Record of Publication                  | <input type="radio"/> |
| Teaching Skills                        | <input type="radio"/> |
| Achieving Local / National Recognition | <input type="radio"/> |
| Teaching or Research Awards            | <input type="radio"/> |
| Mentoring Skills                       | <input type="radio"/> |
| Leadership Skills                      | <input type="radio"/> |

## 15. Do you identify yourself as a "Hospitalist"?

- Yes
- No

## 2014 SGIM Membership Survey

### 16. What is your total financial compensation (normalize to a 1.0 FTE by dividing your actual compensation by your FTE)?

- |                                             |                                             |
|---------------------------------------------|---------------------------------------------|
| <input type="radio"/> Below \$75,000        | <input type="radio"/> \$200,001 - \$225,000 |
| <input type="radio"/> \$75,000-\$100,000    | <input type="radio"/> \$225,001 - \$250,000 |
| <input type="radio"/> \$100,001 - \$125,000 | <input type="radio"/> \$250,001 - \$275,000 |
| <input type="radio"/> \$125,001 - \$150,000 | <input type="radio"/> \$275,001 - \$300,000 |
| <input type="radio"/> \$150,001 - \$175,000 | <input type="radio"/> Above \$300,000       |
| <input type="radio"/> \$175,001 - \$200,000 | <input type="radio"/> Prefer to not answer  |

### 17. How were your current membership dues paid? (Select all that apply.)

- My discretionary professional funds
- Out of my pocket (i.e., non-professional funds)
- Institutional funding (not from discretionary funds)

Other (please specify)

### 18. Regarding institutional funds available to you for scholarly activities and professional dues, do you receive a flat dollar amount or a variable/incentive-based amount?

- Flat dollar amount
- Variable/incentive-based amount

4.

### 19. How much in institutional funds are available annually to you for scholarly activities and professional dues?

- 0 - \$500
- \$501 - \$1000
- \$1001 - \$2000
- \$2001 - \$3000
- \$3001 - \$4000
- \$4001 and up

5.

## 2014 SGIM Membership Survey

**20. What metrics are used to determine the amount of institutional funds that are available to you for scholarly activities and professional dues? (Select all that apply.)**

- Poster presentation
- Oral presentation
- Organization committee membership
- Must be supported by funds provided by a faculty member
- Seniority
- Set number of organizations/meetings per year
- Other (please specify)

**6.**

**21. Overall, how satisfied are you with your current job?**

- |                                         |                                                 |
|-----------------------------------------|-------------------------------------------------|
| <input type="radio"/> 1 - Not Satisfied | <input type="radio"/> 6                         |
| <input type="radio"/> 2                 | <input type="radio"/> 7                         |
| <input type="radio"/> 3                 | <input type="radio"/> 8                         |
| <input type="radio"/> 4                 | <input type="radio"/> 9                         |
| <input type="radio"/> 5                 | <input type="radio"/> 10 - Completely Satisfied |

**7. Additional Trainee Information**

**22. Fellow, Resident, Students: How likely are you to pursue a career in GIM?**

- Likely
- Unlikely
- Not sure

# 2014 SGIM Membership Survey

## 23. In your role as a trainee (fellow, resident, student), what are the three most important needs from a professional organization?

|                                             | First Most Important  | Second Most Important | Third Most Important  |
|---------------------------------------------|-----------------------|-----------------------|-----------------------|
| Finding or working with a mentor            | <input type="radio"/> | <input type="radio"/> | <input type="radio"/> |
| Research skills development                 | <input type="radio"/> | <input type="radio"/> | <input type="radio"/> |
| Teaching skills development                 | <input type="radio"/> | <input type="radio"/> | <input type="radio"/> |
| Clinical skills development                 | <input type="radio"/> | <input type="radio"/> | <input type="radio"/> |
| Writing and publishing manuscripts          | <input type="radio"/> | <input type="radio"/> | <input type="radio"/> |
| Securing funding/grants                     | <input type="radio"/> | <input type="radio"/> | <input type="radio"/> |
| Personal/professional balance               | <input type="radio"/> | <input type="radio"/> | <input type="radio"/> |
| Selecting a fellowship or residency program | <input type="radio"/> | <input type="radio"/> | <input type="radio"/> |
| Finding or negotiating a job                | <input type="radio"/> | <input type="radio"/> | <input type="radio"/> |
| Administrative/Management Skills            | <input type="radio"/> | <input type="radio"/> | <input type="radio"/> |
| N/A                                         | <input type="radio"/> | <input type="radio"/> | <input type="radio"/> |

## 24. How were your current membership dues paid? (Select all that apply.)

- My discretionary professional funds
- Out of my pocket (i.e., non-professional funds)
- Institutional funding (not from discretionary funds)

Other (please specify)

## 25. Regarding institutional funds available to you for scholarly activities and professional dues, do you receive a flat dollar amount or variable/incentive-based amount?

- Flat dollar amount
- Variable/incentive-based amount

8.

## 2014 SGIM Membership Survey

### 26. How much in institutional funds are available annually for scholarly activities and professional dues?

- 0 - \$500
- \$501 - \$1000
- \$1001 - \$2000
- \$2001 - \$3000
- \$3001 - \$4000
- \$4001 and up

9.

### 27. What metrics are used to determine the amount of institutional funds that are available annually to you for scholarly activities and professional dues? (Select all that apply.)

- Poster presentation
- Oral presentation
- Organization committee membership
- Grant/RVU/other incentive at your home institution
- Seniority
- Set number of organizations/meetings per year
- Other (please specify)

## 10. Rating Your SGIM Membership

Please provide your honest feedback regarding your SGIM membership. This information will help insure we support benefits that are important to you.

### \*28. Overall, how valuable is your membership in SGIM?

- Consider membership essential, and will absolutely renew each year.
- Consider membership very valuable, and currently plan to renew next year.
- Consider membership somewhat valuable, unsure about renewing next year.
- Consider membership not valuable, unlikely to renew next year.



# 2014 SGIM Membership Survey

## 29. Please rate SGIM's value to you in the following ways:

|                                                   | Not Important         | Important             | Critical              | N/A                   |
|---------------------------------------------------|-----------------------|-----------------------|-----------------------|-----------------------|
| Regional and National Meetings                    | <input type="radio"/> | <input type="radio"/> | <input type="radio"/> | <input type="radio"/> |
| CME credits                                       | <input type="radio"/> | <input type="radio"/> | <input type="radio"/> | <input type="radio"/> |
| Opportunities to present your work                | <input type="radio"/> | <input type="radio"/> | <input type="radio"/> | <input type="radio"/> |
| Opportunities to publish your work                | <input type="radio"/> | <input type="radio"/> | <input type="radio"/> | <input type="radio"/> |
| Networking                                        | <input type="radio"/> | <input type="radio"/> | <input type="radio"/> | <input type="radio"/> |
| Mentorship                                        | <input type="radio"/> | <input type="radio"/> | <input type="radio"/> | <input type="radio"/> |
| National advocacy                                 | <input type="radio"/> | <input type="radio"/> | <input type="radio"/> | <input type="radio"/> |
| Providing timely and relevant news and discussion | <input type="radio"/> | <input type="radio"/> | <input type="radio"/> | <input type="radio"/> |
| GIM focused publications                          | <input type="radio"/> | <input type="radio"/> | <input type="radio"/> | <input type="radio"/> |
| Developing clinical skills and knowledge          | <input type="radio"/> | <input type="radio"/> | <input type="radio"/> | <input type="radio"/> |
| Developing research skills and knowledge          | <input type="radio"/> | <input type="radio"/> | <input type="radio"/> | <input type="radio"/> |
| Developing administrative skills and knowledge    | <input type="radio"/> | <input type="radio"/> | <input type="radio"/> | <input type="radio"/> |
| Job search sources                                | <input type="radio"/> | <input type="radio"/> | <input type="radio"/> | <input type="radio"/> |
| Career development resources                      | <input type="radio"/> | <input type="radio"/> | <input type="radio"/> | <input type="radio"/> |
| Opportunities to Volunteer                        | <input type="radio"/> | <input type="radio"/> | <input type="radio"/> | <input type="radio"/> |

## 30. If you selected "Not Important" for any of the areas above, please describe your reasons:

## 11. Rating your SGIM Membership continued

## 2014 SGIM Membership Survey

### 31. Please rate whether SGIM currently puts the correct amount of emphasis on each of the following activities:

|                                                            | Not enough            | Just right            | Too much              | N/A                   |
|------------------------------------------------------------|-----------------------|-----------------------|-----------------------|-----------------------|
| Regional meetings                                          | <input type="radio"/> | <input type="radio"/> | <input type="radio"/> | <input type="radio"/> |
| National meetings                                          | <input type="radio"/> | <input type="radio"/> | <input type="radio"/> | <input type="radio"/> |
| Mentoring programs                                         | <input type="radio"/> | <input type="radio"/> | <input type="radio"/> | <input type="radio"/> |
| JGIM                                                       | <input type="radio"/> | <input type="radio"/> | <input type="radio"/> | <input type="radio"/> |
| GIM Connect                                                | <input type="radio"/> | <input type="radio"/> | <input type="radio"/> | <input type="radio"/> |
| National GIM advocacy                                      | <input type="radio"/> | <input type="radio"/> | <input type="radio"/> | <input type="radio"/> |
| Providing timely and relevant GIM news and information     | <input type="radio"/> | <input type="radio"/> | <input type="radio"/> | <input type="radio"/> |
| Job search sources                                         | <input type="radio"/> | <input type="radio"/> | <input type="radio"/> | <input type="radio"/> |
| Career development resources                               | <input type="radio"/> | <input type="radio"/> | <input type="radio"/> | <input type="radio"/> |
| Facilitating members' career advancement (promotions, etc) | <input type="radio"/> | <input type="radio"/> | <input type="radio"/> | <input type="radio"/> |
| Developing members' leadership skills                      | <input type="radio"/> | <input type="radio"/> | <input type="radio"/> | <input type="radio"/> |
| Developing members' clinical skills                        | <input type="radio"/> | <input type="radio"/> | <input type="radio"/> | <input type="radio"/> |
| Developing members' research skills                        | <input type="radio"/> | <input type="radio"/> | <input type="radio"/> | <input type="radio"/> |
| Developing members' administrative skills                  | <input type="radio"/> | <input type="radio"/> | <input type="radio"/> | <input type="radio"/> |
| Networking with other members                              | <input type="radio"/> | <input type="radio"/> | <input type="radio"/> | <input type="radio"/> |
| Providing members opportunities to present their work      | <input type="radio"/> | <input type="radio"/> | <input type="radio"/> | <input type="radio"/> |
| Providing members opportunities to publish their work      | <input type="radio"/> | <input type="radio"/> | <input type="radio"/> | <input type="radio"/> |
| Opportunities to Volunteer                                 | <input type="radio"/> | <input type="radio"/> | <input type="radio"/> | <input type="radio"/> |

## 12. Rating Your SGIM Membership Continued

# 2014 SGIM Membership Survey

## 32. SGIM's professional resources and publications are listed below. Rate them in importance to you.

|                                                                                               | I Didn't Know About This Resource | Not Valuable          | Valuable              | Very Valuable         | Essential             |
|-----------------------------------------------------------------------------------------------|-----------------------------------|-----------------------|-----------------------|-----------------------|-----------------------|
| Annual National Meeting                                                                       | <input type="radio"/>             | <input type="radio"/> | <input type="radio"/> | <input type="radio"/> | <input type="radio"/> |
| Presentation opportunities at the annual national meeting                                     | <input type="radio"/>             | <input type="radio"/> | <input type="radio"/> | <input type="radio"/> | <input type="radio"/> |
| Regional meetings                                                                             | <input type="radio"/>             | <input type="radio"/> | <input type="radio"/> | <input type="radio"/> | <input type="radio"/> |
| Presentation opportunities at regional meetings                                               | <input type="radio"/>             | <input type="radio"/> | <input type="radio"/> | <input type="radio"/> | <input type="radio"/> |
| Mentoring Program(s)                                                                          | <input type="radio"/>             | <input type="radio"/> | <input type="radio"/> | <input type="radio"/> | <input type="radio"/> |
| JGIM (print)                                                                                  | <input type="radio"/>             | <input type="radio"/> | <input type="radio"/> | <input type="radio"/> | <input type="radio"/> |
| JGIM (online)                                                                                 | <input type="radio"/>             | <input type="radio"/> | <input type="radio"/> | <input type="radio"/> | <input type="radio"/> |
| Forum                                                                                         | <input type="radio"/>             | <input type="radio"/> | <input type="radio"/> | <input type="radio"/> | <input type="radio"/> |
| eNews                                                                                         | <input type="radio"/>             | <input type="radio"/> | <input type="radio"/> | <input type="radio"/> | <input type="radio"/> |
| GIM Connect                                                                                   | <input type="radio"/>             | <input type="radio"/> | <input type="radio"/> | <input type="radio"/> | <input type="radio"/> |
| Networking opportunities within SGIM                                                          | <input type="radio"/>             | <input type="radio"/> | <input type="radio"/> | <input type="radio"/> | <input type="radio"/> |
| Providing leadership on the future of GIM                                                     | <input type="radio"/>             | <input type="radio"/> | <input type="radio"/> | <input type="radio"/> | <input type="radio"/> |
| Participating in the organization (serving on committees, task forces, interest groups, etc.) | <input type="radio"/>             | <input type="radio"/> | <input type="radio"/> | <input type="radio"/> | <input type="radio"/> |

## 13. Communications and Social Media

### \*33. How should SGIM disseminate and communicate the work of its committees to its members? (Select all that apply.)

- Forum
- JGIM
- eNews
- Email
- Other (please specify)
- GIM Connect
- SGIM Facebook page
- Twitter

Please provide feedback on SGIM's website - [www.sgim.org](http://www.sgim.org):

# 2014 SGIM Membership Survey

## 34. How often do you use the SGIM website?

- Daily
- Weekly
- Monthly
- Only around the Annual Meeting
- Never (Please explain why below.)

## 14.

## 35. Rate the website on the following:

|                                     | Very Poor             | Poor                  | Good                  | Very Good             |
|-------------------------------------|-----------------------|-----------------------|-----------------------|-----------------------|
| Ease of use of the site             | <input type="radio"/> | <input type="radio"/> | <input type="radio"/> | <input type="radio"/> |
| Ease of finding information         | <input type="radio"/> | <input type="radio"/> | <input type="radio"/> | <input type="radio"/> |
| Accurate and up to date information | <input type="radio"/> | <input type="radio"/> | <input type="radio"/> | <input type="radio"/> |
| Usefulness of site search           | <input type="radio"/> | <input type="radio"/> | <input type="radio"/> | <input type="radio"/> |

## 36. What are the best features of the website (www.sgim.org)?

## 37. How might the website (www.sgim.org) be improved?

## 15. Communications and Social Media (Continued)

Please provide feedback on GIM Connect - [connect.sgim.org](http://connect.sgim.org):

## 2014 SGIM Membership Survey

### 38. How often do you use GIM Connect (connect.sgim.org)?

- Daily
- Weekly
- Monthly
- Only around the Annual Meeting
- Never (Please explain why)

## 16. GIM Connect Continued

### 39. Have you ever searched for a member of SGIM on the new SGIM Member Directory located on GIM Connect (connect.sgim.org)?

- Yes  No

### 40. Do you use the mobile app to access GIM Connect (connect.sgim.org)?

- Yes  No

### 41. If you use the GIM Connect mobile app, do you find it easy to use?

- Yes  No  N/A

### 42. What are the best features of GIM Connect (connect.sgim.org)? (Select all that apply.)

- Discussion Forums (such as the All Member Open Forum)  Member Directory
- Resource libraries that archive community documents  Mobile app
- Community event calendars
- Other (please specify)

## 17. National Annual Meeting

### 43. During the last five years, how many national Annual SGIM meetings have you attended?

- 0  3
- 1  4
- 2  5

# 2014 SGIM Membership Survey

## 44. Have you ever applied for CME at the national Annual Meeting?

- Yes  No

## 45. Please assess your level of agreement with each of the following statements using the following scale:

|                                                                         | Disagree              | Somewhat Disagree     | Neutral               | Somewhat Agree        | Agree                 |
|-------------------------------------------------------------------------|-----------------------|-----------------------|-----------------------|-----------------------|-----------------------|
| The SGIM Annual Meeting content addresses my Professional Practice Gaps | <input type="radio"/> |
| The SGIM Annual Meeting content reduces my Professional Practice Gaps   | <input type="radio"/> |
| CME credits should be offered at the SGIM annual meeting                | <input type="radio"/> |
| CME credits should be offered at SGIM regional meetings                 | <input type="radio"/> |

## 18. Regional Meetings

## 46. During the last five years, how many regional meetings did you attend in your institutions region?

- 0  3  
 1  4  
 2  5

## 47. Does your attendance at the Regional SGIM meetings increase or decrease the likelihood that you will attend the National SGIM Meeting?

- More likely to attend the National meeting  
 Less likely to attend the National meeting  
 I did not attend a Regional Meeting  
 No impact

# 2014 SGIM Membership Survey

## 48. How important are the following factors in your decision to attend a Regional Meeting?

|                                              | Not Important         | Somewhat Important    | Important             | Very Important        | Crucial               |
|----------------------------------------------|-----------------------|-----------------------|-----------------------|-----------------------|-----------------------|
| Location of meeting                          | <input type="radio"/> |
| Cost of meeting                              | <input type="radio"/> |
| Clinical content of meeting                  | <input type="radio"/> |
| Research content of meeting                  | <input type="radio"/> |
| Meeting content related to medical education | <input type="radio"/> |
| Opportunities to present                     | <input type="radio"/> |
| Other meeting opportunities                  | <input type="radio"/> |

## 49. If you generally attend the national meeting, but not the regional meeting, please explain your primary reason why (Select all that apply.):

- The meeting is geographically difficult to get to.
- The meeting is too trainee focused.
- The officers for my region haven't effectively advertised the regional meeting to me.
- I don't understand the role of my SGIM region or why the regional meeting would be helpful for me.
- The meeting does not offer an opportunity for professional networking and growth
- The costs of attending the meeting are too high
- I usually attend both the regional and national meeting
- I generally attend only the regional meeting
- Other (please specify)

## 50. Do you feel that the geographic organization of you region works for you?

- Yes
- No
- Not Applicable (International member)

If no, please explain:

## 19. Volunteering

## 2014 SGIM Membership Survey

**51. Do you currently volunteer with SGIM? (Includes, but not limited to: committees, task forces, workgroups, Council, annual meeting reviewers, regional reviewers, mentoring, etc)**

Yes  No

If no, is there a reason why?

**52. Please rate your interest in volunteering with SGIM:**

|                | 1 - Not Interested    | 2                     | 3                     | 4                     | 5 -Extremely Interested |
|----------------|-----------------------|-----------------------|-----------------------|-----------------------|-------------------------|
| Interest Level | <input type="radio"/>   |

## 20. Committee and Task Force Submitted Questions

These questions have been submitted by SGIM Committees and Task Forces.

**53. Adult with Chronic Conditions Originating in Childhood Task Force**

**What CME would be most helpful to aid you in the care of Adults with Chronic Conditions Originating in Childhood (eg autism, cerebral palsy, intellectual disability, congenital heart disease, cystic fibrosis, etc.)? (Select all that apply.)**

- Information regarding specific chronic conditions that you might see, their pathophysiology, common medical complications, and treatments
- Information about transitioning this patient population between pediatric and adult healthcare
- Information about guardianship and legal issues facing this population
- Information about community resources for young adults with special needs
- I am not interested in CME in this area.
- Other (please specify)

**54. Disparities Task Force**

**How satisfied are you with the Disparities Task Force's collaboration with other SGIM Task Forces/Committees to address health disparities through the following:**

|                      | Very Dissatisfied     | Dissatisfied          | Neutral               | Somewhat Satisfied    | Very Satisfied        |
|----------------------|-----------------------|-----------------------|-----------------------|-----------------------|-----------------------|
| Education            | <input type="radio"/> |
| Research             | <input type="radio"/> |
| Clinical innovations | <input type="radio"/> |



# 2014 SGIM Membership Survey

**55. Are you aware of the SGIM Disparities Task Force's Speakers Bureau?**

- Yes  No

**21.**

**56. If you accessed the Speakers Bureau, did you find the information posted to be useful?**

- Yes  No  N/A

**57. If you did not find the Speakers Bureau useful, how can it be improved?**

**22.**

**58. Evidence Based Medicine Task Force:**

**Do you read the SGIM Bottom Line Summaries on the website only?**

- Yes  No

**59. Do you find the SGIM Bottom Line Summaries useful in your clinical practice or education activities?**

- Yes  No  N/A

**60. Geriatrics Task Force**

**Each year, the Distinguished Professor of Geriatrics gives a keynote address during the SGIM Annual meeting. What topics would you like to see the Distinguished Professor of Geriatrics focus on in the next few years? (Choose up to two.)**

- |                                                        |                                                 |
|--------------------------------------------------------|-------------------------------------------------|
| <input type="checkbox"/> Clinical care of older adults | <input type="checkbox"/> Geriatrics Education   |
| <input type="checkbox"/> Health policy                 | <input type="checkbox"/> Clinical research      |
| <input type="checkbox"/> Healthcare systems            | <input type="checkbox"/> Basic science research |
| <input type="checkbox"/> Other (please specify)        |                                                 |

# 2014 SGIM Membership Survey

## 61. What types of workshops focused on geriatrics would you be most likely to attend? (Choose up to two.)

- Clinical care of older adults
- Research methods for studies with older adults
- Research methods for studies that include caregivers
- Other (please specify)
- How to teach geriatrics
- How to build geriatrics curriculum
- How to develop or improve clinical programs

## 23. Committee and Task Force Submitted Questions (Continued)

### 62. Health Policy Committee:

**How effective is SGIM in advocating for policy change, in the following areas, that is relevant to you?**

|                   | 0 - Not Effective at All | 1                     | 2                     | 3                     | 4                     | 5 - Completely Effective | Unsure of SGIM's Effectiveness |
|-------------------|--------------------------|-----------------------|-----------------------|-----------------------|-----------------------|--------------------------|--------------------------------|
| Clinical Practice | <input type="radio"/>    | <input type="radio"/> | <input type="radio"/> | <input type="radio"/> | <input type="radio"/> | <input type="radio"/>    | <input type="radio"/>          |
| Education         | <input type="radio"/>    | <input type="radio"/> | <input type="radio"/> | <input type="radio"/> | <input type="radio"/> | <input type="radio"/>    | <input type="radio"/>          |
| Research Issues   | <input type="radio"/>    | <input type="radio"/> | <input type="radio"/> | <input type="radio"/> | <input type="radio"/> | <input type="radio"/>    | <input type="radio"/>          |

### 63. Which additional opportunities would you be most interested in SGIM providing its members for advocacy? (Select all that apply.)

- Opportunities to advocate on local issues
- More opportunities to engage in "virtual" advocacy (e.g. sending automated emails to Congressmen, GIM Connect group discussions)
- Expanded efforts for patient advocacy
- Additional education on clinical practice, research and education issues through the SGIM website
- Expanded advocacy agenda
- I don't think SGIM is the right venue for advocacy

### 64. I would be most interested in learning about health policy through (Select one.):

- Online Power Point presentations on core topics
- Online recorded lectures on core topics
- Online recorded audio files
- Links to background materials on SGIM policy priorities
- Summary of active issues and SGIM policy priorities
- Health policy sessions at regional and national SGIM conferences

# 2014 SGIM Membership Survey

## 65. Regarding SGIM's annual Hill Day (Select one.):

- I would like to attend this year.
- It is difficult for me to attend but I am interested in participating "virtually"
- I feel that it is a good educational opportunity but am not interested in attending.
- SGIM should focus on other advocacy efforts besides Hill Day.
- I am not aware of SGIM Hill Day

## 66. Please provide one suggestion for how to best engage SGIM members on advocacy issues related to general internal medicine:

## 24. Committee and Task Force Submitted Questions (Continued)

### 67. Research Committee:

In your role as a researcher, rank your three principle interest areas with one being the highest:

|                                     |                                                         |                                                         |                                                         |                                                         |                                                         |
|-------------------------------------|---------------------------------------------------------|---------------------------------------------------------|---------------------------------------------------------|---------------------------------------------------------|---------------------------------------------------------|
|                                     | #1                                                      |                                                         | #2                                                      |                                                         | #3                                                      |
| Please rank your areas of interest: | <input style="width: 80px; height: 20px;" type="text"/> |

Other (please specify)

### 68. Women and Medicine Task Force:

The Women and Medicine Task Force sponsors three major programs throughout the year. How valuable are these three major programs to you?

|                                                                                                         | I didn't know<br>about this<br>resource | Not Valuable          | Valuable              | Very Valuable         | Essential             |
|---------------------------------------------------------------------------------------------------------|-----------------------------------------|-----------------------|-----------------------|-----------------------|-----------------------|
| The Distinguished Professor of Women and Medicine Lecture & Luncheon at SGIM's Annual Meeting           | <input type="radio"/>                   | <input type="radio"/> | <input type="radio"/> | <input type="radio"/> | <input type="radio"/> |
| The Career Advising Program (a mentorship program for female junior faculty seeking academic promotion) | <input type="radio"/>                   | <input type="radio"/> | <input type="radio"/> | <input type="radio"/> | <input type="radio"/> |
| Health Awards Program for Best Women's Health Oral Abstract and Poster at National Annual Meeting       | <input type="radio"/>                   | <input type="radio"/> | <input type="radio"/> | <input type="radio"/> | <input type="radio"/> |

## 25. Additional feedback

# 2014 SGIM Membership Survey

## 69. Please indicate other professional associations to which you belong. (Select all that apply.)

- |                                                                               |                                                                                |
|-------------------------------------------------------------------------------|--------------------------------------------------------------------------------|
| <input type="checkbox"/> Academic Pediatric Association                       | <input type="checkbox"/> Association of Program Directors in Internal Medicine |
| <input type="checkbox"/> Academy for Health Services Research (AcademyHealth) | <input type="checkbox"/> Clerkship Directors in Internal Medicine              |
| <input type="checkbox"/> American Academy of Pharmaceutical Physicians        | <input type="checkbox"/> Society for Medical Decision Making                   |
| <input type="checkbox"/> American College of Physicians                       | <input type="checkbox"/> Society of Hospital Medicine                          |
| <input type="checkbox"/> American Geriatrics Society                          | <input type="checkbox"/> Society of Teachers of Family Medicine                |
| <input type="checkbox"/> American Medical Association                         |                                                                                |
| <input type="checkbox"/> Other (please specify)                               |                                                                                |

## 70. Which of these organizations (if any) do you think of as your "professional home?" (Select all that apply.)

- |                                                                                |                                                                   |
|--------------------------------------------------------------------------------|-------------------------------------------------------------------|
| <input type="checkbox"/> Academic Pediatric Association                        | <input type="checkbox"/> Clerkship Directors in Internal Medicine |
| <input type="checkbox"/> Academy for Health Services Research (AcademyHealth)  | <input type="checkbox"/> Society for Medical Decision Making      |
| <input type="checkbox"/> American Academy of Pharmaceutical Physicians         | <input type="checkbox"/> Society of General Internal Medicine     |
| <input type="checkbox"/> American College of Physicians                        | <input type="checkbox"/> Society of Hospital Medicine             |
| <input type="checkbox"/> American Geriatrics Society                           | <input type="checkbox"/> Society of Teachers of Family Medicine   |
| <input type="checkbox"/> American Medical Association                          | <input type="checkbox"/> None                                     |
| <input type="checkbox"/> Association of Program Directors in Internal Medicine |                                                                   |
| <input type="checkbox"/> Other (please specify)                                |                                                                   |

## 71. If you chose an organization above as your "professional home," what services do they provide that makes it so?

## 2014 SGIM Membership Survey

**72. Do you have GIM colleagues who are not members of SGIM? If so, do you know why they haven't joined? (Select all that apply.)**

- SGIM is not relevant to their career
- Benefits and services of membership do not justify expense
- Disagree with SGIM policies/decisions of SGIM leadership
- Considered another society to be their professional home
- I do not know
- Not Applicable
- Other (please specify)

## 26. Improving SGIM

While all of the collected information will be used to improve SGIM, this section is your chance to give us direct feedback on how to improve.

**73. Please list activities, benefits, or services that SGIM could be doing to increase value to current members and attract new members.**

## 2014 SGIM Membership Survey

**74. Any additional comments or concerns on how SGIM can improve your membership experience?**

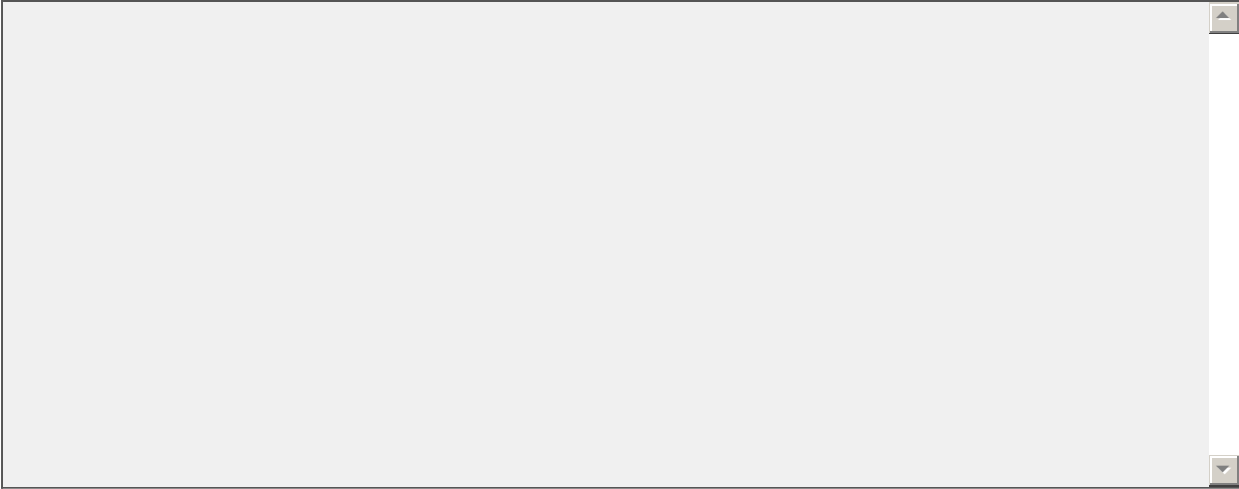

## 27. Thank you!

Thank you for taking the time to complete this survey!

**You are eligible to enter a drawing for free membership in 2015 OR a waiver of registration fees for the 2015 Annual Meeting in Toronto!**

To enter, please go to [2014 Survey Raffle](#) and provide your contact information.

Please send any comments or questions to SGIM's Director of Membership - Jillian Gann at [gannj@sgim.org](mailto:gannj@sgim.org)
